# Supplementary material for: Diagnosis, prevention and treatment of common shoulder injuries in sport: grading the evidence – a statement paper commissioned by the Danish Society of Sports Physical Therapy (DSSF)
Source: PubMed Central journal article supplement — Br J Sports Med. 2022 Oct 19;57(7):408–16. doi: 10.1136/bjsports-2022-105674 (PMC10086287; doi:10.1136/bjsports-2022-105674), 2022-10-19
Supplement: bjsports-2022-105674supp001.pdf [file bjsports-2022-105674supp001.pdf]

**Domain 1: Diagnostics**

|                         | <b>Combined with AND</b>                                                                                                                                                                                                                                                                                                                                                                                                                                                                                                                                                                                                                                                                                                                                                                                                                                                                                                                                       |                                                                                                                                                                          |                                                                            |                                                                                                                                                                                                                                                                                                                              |
|-------------------------|----------------------------------------------------------------------------------------------------------------------------------------------------------------------------------------------------------------------------------------------------------------------------------------------------------------------------------------------------------------------------------------------------------------------------------------------------------------------------------------------------------------------------------------------------------------------------------------------------------------------------------------------------------------------------------------------------------------------------------------------------------------------------------------------------------------------------------------------------------------------------------------------------------------------------------------------------------------|--------------------------------------------------------------------------------------------------------------------------------------------------------------------------|----------------------------------------------------------------------------|------------------------------------------------------------------------------------------------------------------------------------------------------------------------------------------------------------------------------------------------------------------------------------------------------------------------------|
|                         | <b>Injury</b>                                                                                                                                                                                                                                                                                                                                                                                                                                                                                                                                                                                                                                                                                                                                                                                                                                                                                                                                                  | <b>Region</b>                                                                                                                                                            | <b>Test data</b>                                                           | <b>Specific tests</b>                                                                                                                                                                                                                                                                                                        |
| <b>Combined with OR</b> | "Athletic Injuries"<br>"injur*"<br>"pain*"<br>"strain*"<br>"syndrom*"<br>"pathology"<br>"impingement"                                                                                                                                                                                                                                                                                                                                                                                                                                                                                                                                                                                                                                                                                                                                                                                                                                                          | "rotator cuff"<br>"shoulder"<br>"Infraspinatus"<br>"supraspinatus"<br>"subscapularis"<br>"teres minor"<br>"shoulder" "rotator cuff"<br>"glenohumeral"<br>"gleno-humeral" | "diagnostic*"<br>"diagnosis"<br>"Physical Examination"<br>"asses*" "test*" | "hawkins*"<br>"speed test"<br>"crank*"<br>"apprehension test*"<br>"bear hug*"<br>"cross body adduction*"<br>"fulcrum"<br>"hornblower*"<br>"lift off"<br>"neer*"<br>"painful arc"<br>"resisted adduction*"<br>"resisted supination*"<br>"sulcus test*"<br>"yergason*"<br>"yocum*"<br>"biceps load"<br>"posterior impingement" |
|                         | <p><b>Combined search strategy</b></p> <p>("Athletic Injuries" / OR "injur*".tw. OR "pain*".tw. OR "strain*".tw. OR "syndrom*".tw. OR "pathology".tw. OR "impingement".tw.) AND ("rotator cuff"/ OR "shoulder"/ OR "Infraspinatus".tw. OR "supraspinatus".tw. OR "subscapularis".tw. OR "teres minor".tw. OR "shoulder".tw. OR "rotator cuff".tw. OR "glenohumeral".tw. OR "glenohumeral".tw.) AND ("diagnostic*".tw. OR "diagnosis"/ OR "Physical Examination"/ OR "asses*".tw. OR "test*".tw.) AND ("hawkins*".tw. OR "speed test".tw. OR ("crank*".mp. AND "test".tw.) OR "apprehension test*".tw. OR "bear hug*".tw. OR "cross body adduction*".tw. OR "fulcrum".tw. OR "hornblower*".tw. OR "lift off".tw. OR ("lift*".mp. AND "off".tw.) OR "neer*".tw. OR "painful arc".tw. OR "resisted adduction*".tw. OR "resisted supination*".tw. OR "sulcus test*".tw. OR "yergason*".tw. OR "yocum*".tw. OR "biceps load".tw. OR "posterior impingement".tw)</p> |                                                                                                                                                                          |                                                                            |                                                                                                                                                                                                                                                                                                                              |
|                         | <b>Number of hits: 1286</b>                                                                                                                                                                                                                                                                                                                                                                                                                                                                                                                                                                                                                                                                                                                                                                                                                                                                                                                                    |                                                                                                                                                                          |                                                                            |                                                                                                                                                                                                                                                                                                                              |

**Domain 2: Prevention**

|                         | <b>Combined with AND</b>                                                                                                                                                                                                                                                                                                                                                                                                                                                                                                                                                                                                                                                                                                                    |                                                                                                    |                                                                                                                                                                          |                                                                  |
|-------------------------|---------------------------------------------------------------------------------------------------------------------------------------------------------------------------------------------------------------------------------------------------------------------------------------------------------------------------------------------------------------------------------------------------------------------------------------------------------------------------------------------------------------------------------------------------------------------------------------------------------------------------------------------------------------------------------------------------------------------------------------------|----------------------------------------------------------------------------------------------------|--------------------------------------------------------------------------------------------------------------------------------------------------------------------------|------------------------------------------------------------------|
|                         | <b>Design</b>                                                                                                                                                                                                                                                                                                                                                                                                                                                                                                                                                                                                                                                                                                                               | <b>Injury</b>                                                                                      | <b>Region</b>                                                                                                                                                            | <b>Intervention</b>                                              |
| <b>Combined with OR</b> | "Systematic Review"<br>"systematic reviews as topic"<br>"meta analysis"<br>"meta analysis as topic"<br>"randomized controlled trial"<br>"randomized controlled trials as topic"<br>"randomised controlled trial"<br>"randomi*"<br>"RCT"                                                                                                                                                                                                                                                                                                                                                                                                                                                                                                     | "Athletic Injuries"<br>"injur*" "pain*"<br>"strain*"<br>"syndrom*"<br>"pathology"<br>"impingement" | "rotator cuff"<br>"shoulder"<br>"Infraspinatus"<br>"supraspinatus"<br>"subscapularis"<br>"teres minor"<br>"shoulder" "rotator cuff"<br>"glenohumeral"<br>"gleno-humeral" | "prevent*"<br>"Primary prevention"<br>"prophyla*"<br>"prophyla*" |
|                         | <b>Combined search strategy</b>                                                                                                                                                                                                                                                                                                                                                                                                                                                                                                                                                                                                                                                                                                             |                                                                                                    |                                                                                                                                                                          |                                                                  |
|                         | ("Systematic Review"/ OR "systematic reviews as topic"/ OR "meta analysis"/ OR "meta analysis as topic"/ OR "randomized controlled trial"/ OR "randomized controlled trials as topic"/ OR "randomised controlled trial".tw. OR "randomized controlled trial".tw. OR "randomi*".tw. OR "RCT".tw.) AND ("Athletic Injuries"/ OR "injur*".tw. OR "pain*".tw. OR "strain*".tw. OR "syndrom*".tw. OR "pathology".tw. OR "impingement".tw.) AND ("rotator cuff"/ OR "shoulder"/ OR "Infraspinatus".tw. OR "supraspinatus".tw. OR "subscapularis".tw. OR "teres minor".tw. OR "shoulder".tw. OR "rotator cuff".tw. OR "glenohumeral".tw. OR "gleno-humeral".tw.) AND ("prevent*".tw. OR Primary prevention/ OR "prophyla*".mp. OR "prophyla*".tw.) |                                                                                                    |                                                                                                                                                                          |                                                                  |
|                         | <b>Number of hits: 932</b>                                                                                                                                                                                                                                                                                                                                                                                                                                                                                                                                                                                                                                                                                                                  |                                                                                                    |                                                                                                                                                                          |                                                                  |

**Domain 3: Treatment**

| <b>Combined with AND</b> |                                                                                                                                                                                                                                                                                                                                                                                                                                                                                                                                                                                                                                                                                                                                                                                                                       |                                                                                                    |                                                                                                                                  |                                                                                                                                                                                                                                                           |
|--------------------------|-----------------------------------------------------------------------------------------------------------------------------------------------------------------------------------------------------------------------------------------------------------------------------------------------------------------------------------------------------------------------------------------------------------------------------------------------------------------------------------------------------------------------------------------------------------------------------------------------------------------------------------------------------------------------------------------------------------------------------------------------------------------------------------------------------------------------|----------------------------------------------------------------------------------------------------|----------------------------------------------------------------------------------------------------------------------------------|-----------------------------------------------------------------------------------------------------------------------------------------------------------------------------------------------------------------------------------------------------------|
| <b>Combined with OR</b>  | Region                                                                                                                                                                                                                                                                                                                                                                                                                                                                                                                                                                                                                                                                                                                                                                                                                | Injury                                                                                             | Design                                                                                                                           | Treatment                                                                                                                                                                                                                                                 |
|                          | "rotator cuff"<br>"shoulder"<br>"Infraspinatus"<br>"supraspinatus"<br>"subscapularis"<br>"teres minor"<br>"shoulder" "rotator cuff"<br>"glenohumeral"<br>gleno-humeral"                                                                                                                                                                                                                                                                                                                                                                                                                                                                                                                                                                                                                                               | "Athletic Injuries"<br>"injur*" "pain*"<br>"strain*"<br>"syndrom*"<br>"pathology"<br>"impingement" | "randomized controlled trial"<br>"randomized controlled trials as topic"<br>"randomised controlled trial"<br>"randomi*"<br>"RCT" | "education"<br>"exercis*"<br>"exercise"<br>"exercise therapy"<br>"physiotherap*"<br>"physical therapy modalities"<br>"Ultrasound"<br>("ultrasonography"<br>"ultrasonics"/)<br>"Shockwave"<br>"Extracorporeal Shockwave Therapy" "Tape"<br>"Athletic Tape" |
|                          | <b>Combined search strategy</b>                                                                                                                                                                                                                                                                                                                                                                                                                                                                                                                                                                                                                                                                                                                                                                                       |                                                                                                    |                                                                                                                                  |                                                                                                                                                                                                                                                           |
|                          | ("rotator cuff"/ OR "Shoulder"/ OR "Infraspinatus".tw. OR "Subscapularis".tw. OR "teres minor".tw. OR "rotator cuff".tw. OR "Shoulder".tw. OR "Glenohumeral".tw. OR "Gleno-humeral".tw.) AND ("Athletic Injuries"/ OR "injur*".tw. OR "pain*".tw. OR "strain*".tw. OR "syndrom*".tw. OR "pathology".tw. OR "impingement".tw.) AND ("randomized controlled trial"/ OR "randomized controlled trials as topic"/ OR "randomised controlled trial".tw. OR "randomized controlled trial".tw. OR "randomi*".tw. OR "RCT".tw.) AND ("education"/ OR "exercis*".tw. OR "exercise"/ OR "exercise therapy"/ OR "physiotherap*".tw. OR "physical therapy modalities"/ OR "Ultrasound".tw. OR ("ultrasonography"/ OR "ultrasonics"/) OR "Shockwave".tw. OR "Extracorporeal Shockwave Therapy"/ OR "Tape".tw. OR "Athletic Tape"/) |                                                                                                    |                                                                                                                                  |                                                                                                                                                                                                                                                           |
|                          | <b>Number of hits: 4040</b>                                                                                                                                                                                                                                                                                                                                                                                                                                                                                                                                                                                                                                                                                                                                                                                           |                                                                                                    |                                                                                                                                  |                                                                                                                                                                                                                                                           |
