# Supplementary material for: Diagnosis, prevention and treatment of common shoulder injuries in sport: grading the evidence – a statement paper commissioned by the Danish Society of Sports Physical Therapy (DSSF)
Source: PubMed Central journal article supplement — Br J Sports Med. 2022 Oct 19;57(7):408–16. doi: 10.1136/bjsports-2022-105674 (PMC10086287; doi:10.1136/bjsports-2022-105674), 2022-10-19
Supplement: bjsports-2022-105674supp003.pdf [file bjsports-2022-105674supp003.pdf]

## Supplementary file 3. GRADE

| Table S1. Diagnostics                                                                                                                |                      |                   |                              |              |                      |                      |                      |                           |                        |                                         |                      |
|--------------------------------------------------------------------------------------------------------------------------------------|----------------------|-------------------|------------------------------|--------------|----------------------|----------------------|----------------------|---------------------------|------------------------|-----------------------------------------|----------------------|
| Test                                                                                                                                 | Test result          | Number of studies | Study design                 | Risk of bias | Inconsistency        | Indirectness         | Imprecision          | Other considerations      | Number of participants | Diagnostic accuracy                     | Certainty            |
| <b>Subacromial impingement</b>                                                                                                       |                      |                   |                              |              |                      |                      |                      |                           |                        |                                         |                      |
| Composit test (combination of Hawkins-Kennedy, Neer, Painful arc, Empty can/Jobe, external rotation against resistance) <sup>1</sup> | Positive<br>Negative | 1                 | Prospective cohort study     | Not serious  | Not assessed         | Serious <sup>a</sup> | Serious <sup>b</sup> | None                      | 55                     | LR+=2.93<br>LR-=0.34                    | Low<br>Low           |
| <b>Internal posterosuperior impingement</b>                                                                                          |                      |                   |                              |              |                      |                      |                      |                           |                        |                                         |                      |
| Posterior impingement test <sup>2</sup>                                                                                              | Positive<br>Negative | 1                 | Prospective cohort study     | N/I          | Not assessed         | Not assessed         | Not assessed         | Not assessed              | 69                     | LR+=5.0<br>LR-=0.29                     | N/A <sup>c</sup>     |
| <b>Anterior instability</b>                                                                                                          |                      |                   |                              |              |                      |                      |                      |                           |                        |                                         |                      |
| Apprehension <sup>1</sup>                                                                                                            | Positive<br>Negative | 2                 | Retrospective cohort studies | Not serious  | Not serious          | Serious <sup>a</sup> | Serious <sup>b</sup> | Large effect <sup>d</sup> | 409                    | LR+=17.21<br>LR-=0.39                   | Moderate<br>Low      |
| Relocation <sup>1</sup>                                                                                                              | Positive<br>Negative | 3                 | Cohort studies               | Not serious  | Serious <sup>e</sup> | Serious <sup>a</sup> | Serious <sup>f</sup> | None                      | 509                    | LR+=5.48<br>LR-=0.55                    | Very low<br>Very low |
| Surprise <sup>1</sup>                                                                                                                | Positive<br>Negative | 2                 | Cohort studies               | Not serious  | Serious <sup>e</sup> | Serious <sup>a</sup> | Serious <sup>f</sup> | None                      | 128                    | LR+=5.42<br>LR-=0.25                    | Very low<br>Very low |
| Apprehension + relocation <sup>1</sup>                                                                                               | Positive<br>Negative | 1                 | Prospective cohort study     | Not serious  | Not serious          | Serious <sup>a</sup> | Serious <sup>b</sup> | Large effect <sup>d</sup> | 46                     | LR+=39.68<br>LR-=0.19                   | Moderate<br>Moderate |
| <b>SLAP</b>                                                                                                                          |                      |                   |                              |              |                      |                      |                      |                           |                        |                                         |                      |
| Biceps load II <sup>3c</sup>                                                                                                         | Positive<br>Negative | 1                 | Prospective cohort study     | Not serious  | Not assessed         | Serious <sup>a</sup> | Serious <sup>b</sup> | Large effect <sup>g</sup> | 127                    | LR+=26.38/PPV=92.1<br>LR-=0.11/NPV=95.5 | Moderate<br>Moderate |
| <b>Biceps-Labrum complex injuries</b>                                                                                                |                      |                   |                              |              |                      |                      |                      |                           |                        |                                         |                      |
| O'Brien's active compression; Inside <sup>4 d</sup>                                                                                  | Positive<br>Negative | 1                 | Prospective cohort study     | Not serious  | Not assessed         | Serious <sup>a</sup> | Serious <sup>b</sup> | None                      | 116                    | LR+=1.62/PPV=63.2<br>LR-=0.27/NPV=77.8  | Low<br>Low           |
| O'Brien's active compression; Junctional <sup>4 d</sup>                                                                              | Positive<br>Negative | 1                 | Prospective cohort study     | Not serious  | Not assessed         | Serious <sup>a</sup> | Serious <sup>b</sup> | None                      | 116                    | LR+=2.48/PPV=82.4<br>LR-=0.15/NPV=77.8  | Low<br>Low           |
| O'Brien's active compression;                                                                                                        | Positive<br>Negative | 1                 | Prospective cohort study     | Not serious  | Not assessed         | Serious <sup>a</sup> | Serious <sup>b</sup> | Large effect <sup>h</sup> | 116                    | LR+=2.00/PPV=65.7<br>LR-=0.08/NPV=92.6  | Low<br>Moderate      |

|                                                                 |                      |   |                               |                |                      |                      |                      |                           |     |                                        |                      |
|-----------------------------------------------------------------|----------------------|---|-------------------------------|----------------|----------------------|----------------------|----------------------|---------------------------|-----|----------------------------------------|----------------------|
| Bicipital tunnel <sup>d</sup>                                   |                      |   |                               |                |                      |                      |                      |                           |     |                                        |                      |
| Throwing test;<br>Inside <sup>d</sup>                           | Positive<br>Negative | 1 | Prospective<br>cohort study   | Not<br>serious | Not assessed         | Serious <sup>a</sup> | Serious <sup>b</sup> | None                      | 116 | LR+=2.32/PPV=71.2<br>LR-=0.36/NPV=72.1 | Low<br>Low           |
| Throwing test;<br>Junctional <sup>d</sup>                       | Positive<br>Negative | 1 | Prospective<br>cohort study   | Not<br>serious | Not assessed         | Serious <sup>a</sup> | Serious <sup>b</sup> | None                      | 116 | LR+=3.42/PPV=86.5<br>LR-=0.35/NPV=60.5 | Moderate<br>Low      |
| Throwing test;<br>Bicipital tunnel <sup>d</sup>                 | Positive<br>Negative | 1 | Prospective<br>cohort study   | Not<br>serious | Not assessed         | Serious <sup>a</sup> | Serious <sup>b</sup> | None                      | 116 | LR+=2.09/PPV=66.7<br>LR-=0.40/NPV=72.1 | Low<br>Low           |
| Bicipital tunnel<br>palpation;<br>Inside <sup>d</sup>           | Positive<br>Negative | 1 | Prospective<br>cohort study   | Not<br>serious | Not assessed         | Serious <sup>a</sup> | Serious <sup>b</sup> | None                      | 116 | LR+=1.92/PPV=67.2<br>LR-=0.16/NPV=85.7 | Low<br>Moderate      |
| Bicipital tunnel<br>palpation;<br>Junctional <sup>d</sup>       | Positive<br>Negative | 1 | Prospective<br>cohort study   | Not<br>serious | Not assessed         | Serious <sup>a</sup> | Serious <sup>b</sup> | Large effect <sup>h</sup> | 116 | LR+=3.43/PPV=86.6<br>LR-=0.09/NPV=85.7 | Moderate<br>Moderate |
| Bicipital tunnel<br>palpation;<br>Bicipital tunnel <sup>d</sup> | Positive<br>Negative | 1 | Prospective<br>cohort study   | Not<br>serious | Not assessed         | Serious <sup>a</sup> | Serious <sup>b</sup> | Large effect <sup>h</sup> | 116 | LR+=2.24/PPV=68.2<br>LR-=0.04/NPV=96.4 | Low<br>Moderate      |
| Yergasons test;<br>Inside <sup>d</sup>                          | Positive<br>Negative | 1 | Prospective<br>cohort study   | Not<br>serious | Not assessed         | Serious <sup>a</sup> | Serious <sup>b</sup> | None                      | 116 | LR+=2.13<br>LR-=0.76                   | Low<br>Low           |
| Yergasons test;<br>Junctional <sup>d</sup>                      | Positive<br>Negative | 1 | Prospective<br>cohort study   | Not<br>serious | Not assessed         | Serious <sup>a</sup> | Serious <sup>b</sup> | None                      | 116 | LR+=6.57<br>LR-=0.83                   | Low<br>Low           |
| Yergasons test;<br>Bicipital tunnel <sup>d</sup>                | Positive<br>Negative | 1 | Prospective<br>cohort study   | Not<br>serious | Not assessed         | Serious <sup>a</sup> | Serious <sup>b</sup> | None                      | 116 | LR+=12.43<br>LR-=0.75                  | Moderate<br>Low      |
| <b>Rotator cuff injury</b>                                      |                      |   |                               |                |                      |                      |                      |                           |     |                                        |                      |
| Painful Arc <sup>5</sup>                                        | Positive<br>Negative | 1 | Prospective<br>cohort study   | Not<br>serious | Not assessed         | Serious <sup>a</sup> | Serious <sup>b</sup> | None                      | 104 | LR+=3.70<br>LR-=0.36                   | Low<br>Low           |
| Gerber/Lift-off<br>test <sup>5</sup>                            | Positive<br>Negative | 2 | Prospective<br>cohort studies | Not<br>serious | Serious <sup>i</sup> | Serious <sup>a</sup> | Serious <sup>b</sup> | None                      | 233 | LR+=1.40-1.50<br>LR-=0.63-0.85         | Low<br>Low           |
| External rotation<br>against<br>resistance <sup>5</sup>         | Positive<br>Negative | 1 | Prospective<br>cohort study   | Not<br>serious | Not assessed         | Serious <sup>a</sup> | Serious <sup>b</sup> | None                      | 203 | LR+=2.60<br>LR-=0.49                   | Low<br>Low           |
| Full can <sup>5</sup>                                           | Positive<br>Negative | 1 | Prospective<br>cohort study   | Not<br>serious | Not assessed         | Serious <sup>a</sup> | Serious <sup>b</sup> | None                      | 104 | LR+=2.40<br>LR-=0.37                   | Low<br>Low           |
| Empty can/Jobe <sup>5</sup>                                     | Positive<br>Negative | 3 | Prospective<br>cohort studies | Not<br>serious | Serious <sup>e</sup> | Serious <sup>a</sup> | Serious <sup>f</sup> | None                      | 337 | LR+=1.30<br>LR-=0.64                   | Very low<br>Very low |
| <b>Full rotator cuff rupture</b>                                |                      |   |                               |                |                      |                      |                      |                           |     |                                        |                      |
| External rotation<br>lag <sup>5</sup>                           | Positive<br>Negative | 1 | Prospective<br>cohort study   | Not<br>serious | Not assessed         | Serious <sup>a</sup> | Serious <sup>b</sup> | None                      | 37  | LR+=7.20<br>LR-=0.57                   | Low<br>Low           |

|                                    |                      |   |                          |             |              |                      |                      |                           |    |                      |                 |
|------------------------------------|----------------------|---|--------------------------|-------------|--------------|----------------------|----------------------|---------------------------|----|----------------------|-----------------|
| Internal rotation lag <sup>5</sup> | Positive<br>Negative | 1 | Prospective cohort study | Not serious | Not assessed | Serious <sup>a</sup> | Serious <sup>b</sup> | Large effect <sup>h</sup> | 37 | LR+=5.60<br>LR-=0.04 | Low<br>Moderate |
| Drop sign <sup>5</sup>             | Positive<br>Negative | 1 | Prospective cohort study | Not serious | Not assessed | Serious <sup>a</sup> | Serious <sup>b</sup> |                           | 37 | LR+=3.20<br>LR-=0.35 | Low<br>Low      |

## Explanations:

<sup>a</sup> Downgraded one level due to the population being non-athletes

<sup>b</sup> Downgraded one level due to a limited number of included studies

<sup>c</sup> The article by Meister et al. was not obtained in full text hindering risk of bias assessment

<sup>d</sup> Positive test result upgraded one level due to high diagnostic accuracy

<sup>e</sup> Downgraded one level due to significant heterogeneity in the pooled estimate

<sup>f</sup> Downgraded one level due to wide 95% confidence intervals in pooled estimates

<sup>g</sup> Positive and negative test results were upgraded one level due to high diagnostic accuracy

<sup>h</sup> Negative test result was upgraded one level due to high diagnostic accuracy

<sup>i</sup> Downgraded one level due to large variability in point estimates between studies

| Table S2. Prevention                                                                                                |                   |                             |                      |               |              |                      |                      |                        |                                               |           |
|---------------------------------------------------------------------------------------------------------------------|-------------------|-----------------------------|----------------------|---------------|--------------|----------------------|----------------------|------------------------|-----------------------------------------------|-----------|
| Outcome/intervention                                                                                                | Number of studies | Study design                | Risk of bias         | Inconsistency | Indirectness | Imprecision          | Other considerations | Number of participants | Effect (95% CI)                               | Certainty |
| <b>Risk of shoulder problems (all shoulder problems)</b>                                                            |                   |                             |                      |               |              |                      |                      |                        |                                               |           |
| Oslo Sports Trauma Research Center Shoulder Injury Prevention program vs. usual care <sup>6</sup>                   | 1                 | Randomized controlled trial | Not serious          | Not assessed  | Not serious  | Serious <sup>a</sup> | None                 | 660                    | OR= 0.72 [0.52 to 0.98]                       | Moderate  |
| <b>Risk of shoulder problems (substantial shoulder problems)</b>                                                    |                   |                             |                      |               |              |                      |                      |                        |                                               |           |
| Oslo Sports Trauma Research Center Shoulder Injury Prevention program vs. usual care <sup>6</sup>                   | 1                 | Randomized controlled trial | Not serious          | Not assessed  | Not serious  | Serious <sup>a</sup> | None                 | 660                    | OR= 0.78 [0.53 to 1.16]                       | Moderate  |
| <b>Risk of shoulder injury</b>                                                                                      |                   |                             |                      |               |              |                      |                      |                        |                                               |           |
| Shoulder Control program vs. usual care <sup>7</sup>                                                                | 1                 | Randomized controlled trial | Not serious          | Not assessed  | Not serious  | Serious <sup>a</sup> | None                 | 464                    | HRR= 0.44 [0.29 to 0.68]                      | Moderate  |
| Throwing injury prevention program vs. usual care <sup>8</sup>                                                      | 1                 | Randomized controlled trial | Not serious          | Not assessed  | Not serious  | Serious <sup>a</sup> | None                 | 237                    | HR= 0.48 [0.21 to 1.08]                       | Moderate  |
| FIFA 11+ shoulder prevention program vs. usual care <sup>9</sup>                                                    | 1                 | Randomized controlled trial | Not serious          | Not assessed  | Not serious  | Serious <sup>a</sup> | None                 | 726                    | IRR= 0.28 [0.13 to 0.60]                      | Moderate  |
| Intervention including Sleeper's stretch vs. usual care <sup>10</sup>                                               | 1                 | Prospective cohort study    | Serious <sup>b</sup> | Not assessed  | Not serious  | Serious <sup>a</sup> | None                 | 46                     | HR=0.35 [0.13 to 0.94]                        | Very low  |
| Intervention including Sleeper's stretch and prone shoulder external rotation exercise vs. usual care <sup>10</sup> | 1                 | Prospective cohort study    | Serious <sup>b</sup> | Not assessed  | Not serious  | Serious <sup>a</sup> | None                 | 60                     | HR=0.47 [0.20 to 1.10]                        | Very low  |
| Pas et al. <sup>11</sup>                                                                                            | 1                 | Randomized controlled trial | Serious <sup>a</sup> | Not assessed  | Not serious  | Serious <sup>a</sup> | None                 | 579                    | OR=0.96 (p=0.93)                              | Low       |
| Achenbach et al. <sup>12</sup>                                                                                      | 1                 | Randomized controlled trial | Serious <sup>a</sup> | Not assessed  | Not serious  | Serious <sup>a</sup> | None                 | 579                    | Absolute risk reduction= -2.5% [-10.3 to 5.4] | Low       |
| <b>Number of shoulder pain episodes</b>                                                                             |                   |                             |                      |               |              |                      |                      |                        |                                               |           |

|                                                                                                                                                                                                                                                                                                                                                                     |   |                             |                      |              |             |                      |      |     |                                                                                             |          |
|---------------------------------------------------------------------------------------------------------------------------------------------------------------------------------------------------------------------------------------------------------------------------------------------------------------------------------------------------------------------|---|-----------------------------|----------------------|--------------|-------------|----------------------|------|-----|---------------------------------------------------------------------------------------------|----------|
| Intervention including functional exercises using resistance bands or dumbbells vs. usual care <sup>13</sup>                                                                                                                                                                                                                                                        | 1 | Randomized controlled trial | Serious <sup>c</sup> | Not assessed | Not serious | Serious <sup>a</sup> | None | 26  | Between-group difference in number of shoulder pain episodes= 2.8 [CI not reported], p=0.02 | Low      |
| <b>Patient-reported shoulder pain</b>                                                                                                                                                                                                                                                                                                                               |   |                             |                      |              |             |                      |      |     |                                                                                             |          |
| Intervention including shoulder strengthening exercises vs. usual care <sup>14</sup>                                                                                                                                                                                                                                                                                | 1 | Randomized controlled trial | Not serious          | Not assessed | Not serious | Serious <sup>a</sup> | None | 206 | Between group difference in VAS= 0.1 [CI not reported], p=0.746                             | Moderate |
| <p>Explanations:</p> <p><sup>a</sup> Downgraded one level due to a limited number of included studies</p> <p><sup>b</sup> Downgraded one level due to critical risk of bias in ROBINS-I</p> <p><sup>c</sup> Downgraded one level due to high risk of bias in ROB-2</p> <p>OR, odds ratio; HR, hazard ratio; IRR, incidence rate ratio; VAS, visual analog scale</p> |   |                             |                      |              |             |                      |      |     |                                                                                             |          |

| Table S3. Treatment                                                                                                                 |                   |                             |              |               |              |                      |                      |                        |                                                                                                                                                                                                         |           |
|-------------------------------------------------------------------------------------------------------------------------------------|-------------------|-----------------------------|--------------|---------------|--------------|----------------------|----------------------|------------------------|---------------------------------------------------------------------------------------------------------------------------------------------------------------------------------------------------------|-----------|
| Intervention/outcome                                                                                                                | Number of studies | Study design                | Risk of bias | Inconsistency | Indirectness | Imprecision          | Other considerations | Number of participants | Effect (95% CI or SD)                                                                                                                                                                                   | Certainty |
| <b>Subacromial impingement</b>                                                                                                      |                   |                             |              |               |              |                      |                      |                        |                                                                                                                                                                                                         |           |
| Intervention including shoulder specific warm-up and exercises vs. no intervention on pain (NRS) <sup>15</sup>                      | 1                 | Randomized controlled trial | Not serious  | Not assessed  | None         | Serious <sup>a</sup> | None                 | 30                     | Within-in group baseline and follow-up scores [SD]<br><br>Intervention<br>7.88 [1.02] to 3.56 [1.31]<br><br>Control<br>7.71 [0.83] to 8.00 [0.88]                                                       | Moderate  |
| Intervention including strengthening exercises (no comparator group) on pain and function (SPADII) <sup>16</sup>                    | 1                 | Prospective cohort study    | Not serious  | Not assessed  | None         | Serious <sup>a</sup> | None                 | 47                     | Within-in group baseline and follow-up scores [SD]<br><br>29.86 [17.03] to 11.7 [13.78]                                                                                                                 | Very low  |
| <b>Supraspinatus tendinopathy</b>                                                                                                   |                   |                             |              |               |              |                      |                      |                        |                                                                                                                                                                                                         |           |
| Interventions including hyperthermia or ultrasound vs. passive stretches on pain (VAS) <sup>17</sup>                                | 1                 | Randomized controlled trial | Not serious  | Not assessed  | None         | Serious <sup>a</sup> | None                 | 37                     | Within-in group baseline and follow-up scores [SD]<br><br>Hyperthermia<br>5.96 [0.83] to 1.2 [0.63]<br><br>Ultrasound<br>6.3 [0.86] to 5.15 [0.87]<br><br>Passive stretches<br>6.1 [0.89] to 4.9 [0.88] | Moderate  |
| Interventions including hyperthermia or ultrasound vs. passive stretches on physical function (Constant Murley Score) <sup>17</sup> | 1                 | Randomized controlled trial | Not serious  | Not assessed  | None         | Serious <sup>a</sup> | None                 | 37                     | Within-in group baseline and follow-up scores [SD]<br><br>Hyperthermia<br>58.6 [3.9] to 82.0 [5.7]<br><br>Ultrasound<br>58.9 [2.8] to 61.8 [4.2]                                                        | Moderate  |

|                                                                                                                                                        |   |                             |                      |              |      |                      |      |    |                                                                                                                                                                                                                                                                             |          |
|--------------------------------------------------------------------------------------------------------------------------------------------------------|---|-----------------------------|----------------------|--------------|------|----------------------|------|----|-----------------------------------------------------------------------------------------------------------------------------------------------------------------------------------------------------------------------------------------------------------------------------|----------|
|                                                                                                                                                        |   |                             |                      |              |      |                      |      |    | Passive stretches<br>59.5 [2.7] to 63.3 [5.6]                                                                                                                                                                                                                               |          |
| <b>Shoulder pain</b>                                                                                                                                   |   |                             |                      |              |      |                      |      |    |                                                                                                                                                                                                                                                                             |          |
| Intervention including anteroposterior mobilisation of the shoulder joint vs. manual treatment vs. attention on pain (VAS) <sup>18</sup>               | 1 | Randomized controlled trial | Not serious          | Not assessed | None | Serious <sup>a</sup> | None | 31 | Within-group changes [95% CI]<br><br>Mobilization<br>0.6 [0.1 to 1.1]<br><br>Manual treatment<br>0.0 [0.0 to 0.3]<br><br>Attention<br>0.2 [-0.2 to 0.7]                                                                                                                     | Moderate |
| Intervention including anteroposterior mobilisation of the shoulder joint vs. manual treatment vs. attention on physical function (DASH) <sup>18</sup> | 1 | Randomized controlled trial | Not serious          | Not assessed | None | Serious <sup>a</sup> | None | 31 | Within-group changes [95% CI]<br><br>Mobilization<br>0.3 [-2.7 to 3.4]<br><br>Manual treatment<br>0.5 [-0.3 to 1.3]<br><br>Attention<br>0.7 [-0.6 to 2.0]                                                                                                                   | Moderate |
| Intervention including posture correcting exercises vs. no intervention on physical function and pain (ASES) <sup>19</sup>                             | 1 | Randomized controlled trial | Serious <sup>b</sup> | Not assessed | None | Serious <sup>a</sup> | None | 28 | Within-in group baseline and follow-up scores [SD]<br><br>Intervention<br>Right shoulder: 89.1 [11.2] to 89.3 [14.6]<br>Left shoulder: 89.9 [11.4] to 91.1 [10.6]<br><br>Control<br>Right shoulder: 90.8 [11.7] to 86.4 [17.9]<br>Left shoulder: 90.7 [12.4] to 86.9 [15.5] | Low      |
| Intervention includes strengthening                                                                                                                    | 1 | Prospective cohort study    | Serious <sup>c</sup> | Not assessed | None | Serious <sup>a</sup> | None | 29 | Within-in group baseline and follow-up scores [SD]                                                                                                                                                                                                                          | Very low |

|                                                                                                                                                                                                                                                                                                                                                                                                                                                                   |   |                          |                      |              |      |                      |      |    |                                                                                                                                                              |          |
|-------------------------------------------------------------------------------------------------------------------------------------------------------------------------------------------------------------------------------------------------------------------------------------------------------------------------------------------------------------------------------------------------------------------------------------------------------------------|---|--------------------------|----------------------|--------------|------|----------------------|------|----|--------------------------------------------------------------------------------------------------------------------------------------------------------------|----------|
| exercises (no comparator group) on pain (VAS) <sup>20</sup>                                                                                                                                                                                                                                                                                                                                                                                                       |   |                          |                      |              |      |                      |      |    | 3-months follow-up:<br>7.5 [2.3] to 3.4 [1.8]<br><br>6 months follow-up:<br>7.5 [2.3] to 2.9 [2.1]                                                           |          |
| Intervention including scapula-focused stretching and strengthening exercises (no comparator group) on pain (VAS) <sup>21</sup>                                                                                                                                                                                                                                                                                                                                   | 1 | Prospective cohort study | Serious <sup>c</sup> | Not assessed | None | Serious <sup>a</sup> | None | 31 | Within-in group baseline and follow-up scores [SD]<br><br>3-months follow-up:<br>7.2 [1.3] to 2.4 [1.8]<br><br>6 months follow-up:<br>7.2 [1.3] to 2.6 [1.4] | Very low |
| <p>Explanations:</p> <p><sup>a</sup> Downgraded one level due to a limited number of included studies</p> <p><sup>b</sup> Downgraded one level due to high risk of bias in ROB-2</p> <p><sup>c</sup> Downgraded one level due to high risk of bias in ROBINS-I</p> <p>NRS, numeric rating scale; SPADI, Shoulder Pain and Disability Index; DASH, Disabilities of the Arm, Shoulder, and Hand; ASES, The American Shoulder and Elbow Surgeons Shoulder Score.</p> |   |                          |                      |              |      |                      |      |    |                                                                                                                                                              |          |



## References

1. Hegedus EJ, Goode AP, Cook CE, Michener L, Myer CA, Myer DM et al. Which physical examination tests provide clinicians with the most value when examining the shoulder? Update of a systematic review with meta-analysis of individual tests. *Br J Sports Med*. 2012;46(14):964-78.
2. Meister K, Buckley B, Batts J. The posterior impingement sign: diagnosis of rotator cuff and posterior labral tears secondary to internal impingement in overhand athletes. *Am J Orthop (Belle Mead NJ)*. 2004;33(8):412-5.
3. Kim SH, Ha KI, Ahn JH, Kim SH, Choi HJ. Biceps load test II: A clinical test for SLAP lesions of the shoulder. *Arthroscopy*. 2001;17(2):160-4.
4. Taylor SA, Newman AM, Dawson C, Gallagher KA, Bowers A, Nguyen J et al. The "3-Pack" Examination Is Critical for Comprehensive Evaluation of the Biceps-Labrum Complex and the Bicipital Tunnel: A Prospective Study. *Arthroscopy*. 2017;33(1):28-38.
5. Hermans J, Luime JJ, Meuffels DE, Reijman M, Simel DL, Bierma-Zeinstra SM. Does this patient with shoulder pain have rotator cuff disease?: The Rational Clinical Examination systematic review. *JAMA*. 2013;310(8):837-47.
6. Andersson SH, Bahr R, Clarsen B, Myklebust G. Preventing overuse shoulder injuries among throwing athletes: a cluster-randomised controlled trial in 660 elite handball players. *Br J Sports Med*. 2017;51(14):1073-80.
7. Asker M, Hägglund M, Waldén M, Källberg H, Skillgate E. The Effect of Shoulder and Knee Exercise Programmes on the Risk of Shoulder and Knee Injuries in Adolescent Elite Handball Players: A Three-Armed Cluster Randomised Controlled Trial. *Sports Medicine - Open*. 2022;8(1):91.
8. Sakata J, Nakamura E, Suzuki T, Suzukawa M, Akeda M, Yamazaki T et al. Throwing Injuries in Youth Baseball Players: Can a Prevention Program Help? A Randomized Controlled Trial. *The American journal of sports medicine*. 2019;47(11):2709-16.
9. Al Attar WSA, Faude O, Bizzini M, Alarifi S, Alzahrani H, Almalki RS et al. The FIFA 11+ Shoulder Injury Prevention Program Was Effective in Reducing Upper Extremity Injuries Among Soccer Goalkeepers: A Randomized Controlled Trial. *The American journal of sports medicine*. 2021;49(9):2293-300.
10. Shitara H, Yamamoto A, Shimoyama D, Ichinose T, Sasaki T, Hamano N et al. Shoulder Stretching Intervention Reduces the Incidence of Shoulder and Elbow Injuries in High School Baseball Players: a Time-to-Event Analysis. *Sci Rep*. 2017;7(1):45304.
11. Pas H, Pluim B, Kilic Ö, Verhagen E, Gouttebauge V, Holman R et al. Effectiveness of an e-health tennis-specific injury prevention programme: randomised controlled trial in adult recreational tennis players. *British Journal of Sports Medicine*. 2020;54:bjsports-2019.
12. Achenbach L, Huppertz G, Zeman F, Weber J, Luig P, Rudert M et al. Multicomponent stretching and rubber band strengthening exercises do not reduce overuse shoulder injuries: a cluster randomised controlled trial with 579 handball athletes. *BMJ Open Sport & Exercise Medicine*. 2022;8(1):e001270.
13. Swanik KA, Swanik CB, Lephart SM, Huxel K. The effect of functional training on the incidence of shoulder pain and strength in intercollegiate swimmers. *Journal of Sport Rehabilitation*. 2002;11(2):140-54.

14. Sommervold M, Østerås H. What is the effect of a shoulder-strengthening program to prevent shoulder pain among junior female team handball players? *Open access journal of sports medicine*. 2017;8:61.
15. Cha JY, Kim JH, Hong J, Choi YT, Kim MH, Cho JH et al. A 12-week rehabilitation program improves body composition, pain sensation, and internal/external torques of baseball pitchers with shoulder impingement symptom. *J Exerc Rehabil*. 2014;10(1):35-44.
16. De Mey K, Danneels L, Cagnie B, Cools AM. Scapular muscle rehabilitation exercises in overhead athletes with impingement symptoms: effect of a 6-week training program on muscle recruitment and functional outcome. *The American journal of sports medicine*. 2012;40(8):1906-15.
17. Giombini A, Di Cesare A, Safran MR, Ciatti R, Maffulli N. Short-term effectiveness of hyperthermia for supraspinatus tendinopathy in athletes: a short-term randomized controlled study. *The American journal of sports medicine*. 2006;34(8):1247-53.
18. Lluch E, Pecos-Martin D, Domenech-Garcia V, Herrero P, Gallego-Izquierdo T. Effects of an anteroposterior mobilization of the glenohumeral joint in overhead athletes with chronic shoulder pain: A randomized controlled trial. *Musculoskelet Sci Pract*. 2018;38:91-8.
19. Lynch SS, Thigpen CA, Mihalik JP, Prentice WE, Padua D. The effects of an exercise intervention on forward head and rounded shoulder postures in elite swimmers. *Br J Sports Med*. 2010;44(5):376-81.
20. Merolla G, De Santis E, Campi F, Paladini P, Porcellini G. Supraspinatus and infraspinatus weakness in overhead athletes with scapular dyskinesis: strength assessment before and after restoration of scapular musculature balance. *Musculoskelet Surg*. 2010;94(3):119-25.
21. Merolla G, De Santis E, Sperling JW, Campi F, Paladini P, Porcellini G. Infraspinatus strength assessment before and after scapular muscles rehabilitation in professional volleyball players with scapular dyskinesis. *Journal of shoulder and elbow surgery*. 2010;19(8):1256-64.
